# Supplementary material for: Identification of the Core Promoter and Variants Regulating Chicken CCKAR Expression
Source: MDPI journal article supplement (doi:10.3390/genes13061083), 2022-06-18
Supplement: s1 [file s1]

Table S1 Primers used to resequencing of 21 kb region around the *CCKAR*

| Name           | Position on chromosome 4 <sup>1</sup> | Forward primer (5'-3')   | Reverse primer (5'-3')   |
|----------------|---------------------------------------|--------------------------|--------------------------|
| CCKAR_up5k_O   | 73195458-73196287                     | CCCAAACATCCAACCTCCAA     | TTTGTGTTGTTGACTCTTGCTCTT |
| CCKAR_up5k_N   | 73196237-73197039                     | AAAAGGGCCTGGAGATTATCA    | CATTGTGTTGAGGGACATGG     |
| CCKAR_up5k_M   | 73196971-73197755                     | CCATTCCAACCTCCAAGCA      | GTGAGAAGAGACCAACCCCA     |
| CCKAR_up5k_K   | 73197549-73198252                     | AGTACAGAAAGGACATTGAGGTG  | GGTCTTCCTCTGGATCTGCT     |
| CCKAR_up5k_B   | 73198149-73198848                     | TCTGCTCTGCCCTTGTCAG      | GGGTTTGTGTCAGATCTTTC     |
| CCKAR_up5k_C   | 73198698-73199363                     | TCCACAGAATCAATGGCCTT     | GGGATGTTGGGAATTTTAGGCA   |
| CCKAR_up5k_D   | 73199217-73199906                     | ACATTTCTCTAGACTACCTGCAG  | CTGGCTCTTCATCTCAAAGGT    |
| CCKAR_up5k_E   | 73199766-73200417                     | AATCCAGCTCAGTCCAGGAC     | ATAGCTGAGACAAGGCTTCC     |
| CCKAR_up5k_F   | 73200254-73200889                     | TGCCAGAAAAGAACCAGGAGA    | CTTCCATGAGCACTGTGGC      |
| CCKAR_up5k_L   | 73200644-73201569                     | AAGAGATTGCTGCAGTTACGA    | TACTCTGACCTGCTGCAAAC     |
| CCKAR_up5k_H   | 73201354-73201992                     | ACGAAGCTGAAAACACATCCA    | ATCCCAAACGTCTGAGTGGC     |
| CCKAR_up5k_I   | 73201830-73202452                     | AGTTTTGGCATCTTAGACTGGA   | ACTTGCAAACAGGATGTGCA     |
| CCKARupstream  | 73202367-73203453                     | TACCCTTGAGGCTGGAAATG     | ACCCTCTTCTGTTACTGGCC     |
| CCKAR_exon1    | 73203262-73203789                     | GTGGTGTGGTTGAGAGACG      | CAGCAAAGCAGTGATGTTGG     |
| CCKAR_exon1b   | 73203691-73204318                     | AACCAGCCTTCTTCCTAGCAG    | GTGCACTGCTCATTACCAC      |
| CCKAR_intron1  | 73203781-73204630                     | GCTTTGCTGTGTGATATCCTCT   | ACAATACAGCAGGATCCGGA     |
| CCKAR_exon2    | 73204497-73204903                     | GGCTTTTGAAAGGGTGTACCT    | TTCTCACATACCCCACTGGTT    |
| CCKAR_intron2D | 73204746-73205734                     | TAATGCTCTGCCTCTTCTGC     | GCTGAAATGTGCAGAATCGG     |
| CCKAR_intron2B | 73205578-73206420                     | GAACCAGTACAAATAAAGGCTGT  | TGAAAGCAGAAGGAAGGCAC     |
| CCKAR_intron2C | 73206231-73207058                     | CACCAATCAAGCAGGACAAGT    | AGCGTACATGTTTCCAGATGG    |
| CCKAR_exon3    | 73206618-73207199                     | CATTTGAAAACAGCAGAAGCA    | TTACAGCAGGGGCTTAGCAG     |
| CCKAR_intron3C | 73206857-73207748                     | GCAAGCTGGTCCCTTTCAC      | ACCTGTATCCTTCCTCCTCAC    |
| CCKAR_intron3B | 73207573-73208420                     | TGCTTCAACTGGTGCTGAGA     | GCCTCAAGATGACTGCTCAC     |
| CCKAR_exon4    | 73207950-73208628                     | AGGCACTCCCCTTTAAGAGC     | GGTCTTAATCCACAGCCAGA     |
| CCKAR_intron4  | 73208327-73209281                     | TTGATACCAGCCAGAGAAGATC   | GTGTAGGACAGCAGGTGGAT     |
| CCKAR_exon5    | 73208763-73209391                     | AATACTGGTGCCAGCAAAC      | CTCTAATCACAGGCGGCTTC     |
| CCKAR_exon5b   | 73209117-73209622                     | GGCCAAGAACTTGTCATCC      | CTCACAGCGTTTACTGTCAGC    |
| CCKAR_3'UTR    | 73209326-73210348                     | GTTTCCGCATGGGTTTTCTA     | TTCAGCCTTATCCCTGTGCT     |
| CCKAR_down5k_A | 73210260-73211236                     | CACCCATGCATGTAAAGGGC     | GTCTCATCCTGCAGCCTGA      |
| CCKAR_down5k_B | 73211174-73212124                     | ACGGGATTTAGTTTCGTAACAGTG | GTTACCAACCTGTTCTGCTCA    |
| CCKAR_down5k_C | 73212061-73213031                     | TCAGATACTGCTCTCGATGGA    | AGGCTGCCTTGATATCTACC     |
| CCKAR_down5k_D | 73212892-73213891                     | ATCAGCAGCCTCCACATCAT     | TTCTGGGTAGTCTCGTGTGG     |
| CCKAR_down5k_E | 73213797-73214742                     | CAGGCAGAACGTAGCATTGT     | TGCATTCAAAGGGAAGGGA      |
| CCKAR_down5k_F | 73214649-73215637                     | AAAACAATGCAGTCCAGGGG     | TTAAACCATGCTGCTCCGG      |
| CCKAR_down5k_H | 73215507-73216805                     | TTCACCAACAGCCCACTAC      | TGTATGAGGGAAGCTGCGC      |

<sup>1</sup> Position of fragments is shown based on the galGal6.0 chicken genome assembly.

**Table S2 Information of variants within the 21 kb region around the CCKAR**

| order | Physical position on chromosome 4 <sup>1</sup> | Position relative to CCKAR | dbSNP Access No. | High-growth allele <sup>2</sup> | Low-growth allele <sup>2</sup> | Variants studied in reporter gene assay |
|-------|------------------------------------------------|----------------------------|------------------|---------------------------------|--------------------------------|-----------------------------------------|
| 1     | 73196337                                       | 5' flanking region         | rs736847850      | T                               | C                              |                                         |
| 2     | 73196383                                       |                            | rs317607465      | G                               | T                              |                                         |
| 3     | 73196641                                       |                            | rs732495896      | T                               | C                              |                                         |
| 4     | 73196708                                       |                            | rs16434830       | C                               | G                              |                                         |
| 5     | 73196743                                       |                            | rs740521921      | C                               | T                              |                                         |
| 6     | 73196745                                       |                            | rs730956454      | T                               | C                              |                                         |
| 7     | 73196779-73196780                              |                            | novel            | TG                              | CA                             |                                         |
| 8     | 73196831                                       |                            | rs731668344      | C                               | G                              |                                         |
| 9     | 73196845                                       |                            | rs741200827      | C                               | T                              |                                         |
| 10    | 73196891                                       |                            | rs739070235      | A                               | G                              |                                         |
| 11    | 73196961                                       |                            | rs16434831       | G                               | A                              |                                         |
| 12    | 73196979                                       |                            | rs16434832       | G                               | A                              |                                         |
| 13    | 73197038                                       |                            | rs735487023      | T                               | C                              |                                         |
| 14    | 73197046                                       |                            | rs738864180      | C                               | T                              |                                         |
| 15    | 73197067                                       |                            | rs739505529      | A                               | G                              |                                         |
| 16    | 73197317                                       |                            | rs732507897      | A                               | T                              |                                         |
| 17    | 73197353                                       |                            | rs735868663      | G                               | C                              |                                         |
| 18    | 73197354-73197355                              |                            | novel            | CACTTG<br>G                     | del                            |                                         |
| 19    | 73197356                                       |                            | novel            | G                               | C                              |                                         |
| 20    | 73197767                                       |                            | rs741249832      | C                               | T                              |                                         |
| 21    | 73197824                                       |                            | rs732324989      | A                               | G                              |                                         |
| 22    | 73198024                                       |                            | rs14489886       | T                               | C                              |                                         |
| 23    | 73198364                                       |                            | rs738332766      | A                               | T                              |                                         |
| 24    | 73198367                                       |                            | rs741716927      | T                               | G                              |                                         |
| 25    | 73198431                                       |                            | rs731434187      | T                               | A                              |                                         |
| 26    | 73198450                                       |                            | rs738921885      | A                               | G                              |                                         |
| 27    | 73198468                                       |                            | rs739517525      | G                               | A                              |                                         |
| 28    | 73198532                                       |                            | rs739346556      | C                               | T                              |                                         |
| 29    | 73198560                                       |                            | rs736628093      | G                               | A                              |                                         |
| 30    | 73198969                                       |                            | rs735180511      | A                               | G                              |                                         |
| 31    | 73199139                                       |                            | novel            | A                               | del                            |                                         |
| 32    | 73199343                                       |                            | rs732342426      | A                               | G                              | CSNP1                                   |
| 33    | 73199485                                       |                            | rs740461407      | T                               | G                              | CSNP2                                   |
| 34    | 73199573                                       |                            | rs14489888       | G                               | A                              |                                         |
| 35    | 73199919                                       |                            | rs734291116      | G                               | A                              |                                         |
| 36    | 73199976                                       |                            | rs733458406      | del                             | C                              |                                         |
| 37    | 73200031                                       |                            | rs741747714      | T                               | del                            |                                         |

|    |          |                     |    |     |        |
|----|----------|---------------------|----|-----|--------|
| 38 | 73200087 | rs741769582         | G  | A   |        |
| 39 | 73200156 | rs731441446         | T  | C   |        |
| 40 | 73200187 | rs315346474         | G  | T   |        |
| 41 | 73200408 | rs731258025         | C  | T   |        |
| 42 | 73200656 | rs735879555         | T  | C   |        |
| 43 | 73200759 | rs740873708         |    | AAA |        |
| 44 | 73200862 | rs731781640         | C  | T   |        |
| 45 | 73200869 | rs736179655         | G  | A   |        |
| 46 | 73201089 | rs739862145         | A  | G   |        |
| 47 | 73201818 | rs317340954         | C  | T   | PSNP1  |
| 48 | 73201849 | rs312791200         | A  | G   | PSNP2  |
| 49 | 73202211 | rs80637605          | G  | A   | PSNP3  |
| 50 | 73202255 | rs80691628          | A  | G   | PSNP4  |
| 51 | 73202352 | rs735709526         | T  | C   | PSNP5  |
| 52 | 73202359 | rs80644257          | C  | G   | PSNP6  |
| 53 | 73202606 | rs312284610         | C  | A   | PSNP7  |
| 54 | 73202645 | rs316320621         | C  | G   | PSNP8  |
| 55 | 73202678 | rs314545738         | A  | T   | PSNP9  |
| 56 | 73202789 | rs315057890         | G  | A   | PSNP10 |
| 57 | 73202903 | rs313514148         | T  | A   | PSNP11 |
| 58 | 73202945 | rs317602219         | T  | A   | PSNP12 |
| 59 | 73203073 | rs315801080         | AC | TG  | PSNP13 |
| 60 | 73203080 | rs313590990         | C  | G   | PSNP14 |
| 61 | 73203170 | rs794017713         | G  | A   | PSNP15 |
| 62 | 73203188 | rs80606852          | G  | A   | PSNP16 |
| 63 | 73203705 | 5'UTR rs313822901   | A  | C   | PSNP17 |
| 64 | 73203819 | Exon1 rs314084118   | T  | C   | PSNP18 |
| 65 | 73204044 | Intron1 rs315176011 | C  | T   | PSNP19 |
| 66 | 73204457 | rs733514605         | T  | G   |        |
| 67 | 73204458 | rs794546486         | G  | A   |        |
| 68 | 73204544 | rs313134890         | A  | C   |        |
| 69 | 73204550 | rs314414260         | T  | C   |        |
| 70 | 73204977 | Intron2 rs316160134 | C  | G   |        |
| 71 | 73204990 | rs314874785         | C  | G   |        |
| 72 | 73205026 | rs315156020         | C  | T   |        |
| 73 | 73205061 | rs315703810         | T  | C   |        |
| 74 | 73205162 | rs316781477         | C  | A   |        |
| 75 | 73205164 | rs316193938         | T  | A   |        |
| 76 | 73205380 | rs740298767         | T  | C   |        |
| 77 | 73205652 | rs317439365         | A  | G   |        |
| 78 | 73205673 | rs13774462          | A  | C   |        |
| 79 | 73205750 | rs13774463          | C  | T   | CSNP3  |
| 80 | 73205766 | rs15616835          | A  | G   |        |
| 81 | 73205821 | rs13774464          | T  | C   |        |

|     |                   |            |                     |       |          |                |
|-----|-------------------|------------|---------------------|-------|----------|----------------|
| 82  | 73205867          |            | rs13774465          | T     | C        |                |
| 83  | 73206071          |            | rs314128048         | A     | G        |                |
| 84  | 73206185          |            | rs733004022         | A     | T        |                |
| 85  | 73206488          |            | rs314082180         | T     | C        |                |
| 86  | 73206650          |            | rs314888442         | G     | A        |                |
| 87  | 73206696          | Exon3      | rs315278615         | C     | T        |                |
| 88  | 73206714          |            | rs315131298         | C     | T        |                |
| 89  | 73206958          | Intron3    | rs315744114         | G     | A        |                |
| 90  | 73206972          |            | rs315844714         | G     | A        |                |
| 91  | 73207405          |            | rs316313304         | T     | C        |                |
|     |                   |            | g.73207592-73207605 |       |          |                |
| 92  |                   |            | GATGTAAGATTT        | AAGAT | GATGTAA  |                |
|     | 73207592-73207605 |            | TAA>AAGATGTAAGAT    | GTAAG | GATTTTAA |                |
| 93  | 73207637          |            | rs317244862         | A     | G        |                |
| 94  | 73207665          |            | rs317125667         | T     | C        |                |
| 95  | 73207680          |            | rs734524617         | C     | T        |                |
| 96  | 73207685          |            | rs736521747         | T     | C        |                |
| 97  | 73207696          |            | rs317828971         | A     | G        |                |
| 98  | 73207763          |            | rs318084470         | A     | C        |                |
| 99  | 73207790          |            | rs317922543         | A     | G        | g.73207790 A>G |
| 100 | 73208653          | Intron4    | rs14489895          | T     | C        |                |
| 101 | 73208701          |            | rs14489896          | G     | A        |                |
| 102 | 73208771          |            | rs316271214         | T     | C        |                |
| 103 | 73208780          |            | rs316578408         | G     | A        |                |
| 104 | 73208826          |            | rs313367589         | del   | T        |                |
| 105 | 73208894          |            | rs313682508         | G     | A        |                |
| 106 | 73208913          |            | rs316541372         | G     | A        |                |
| 107 | 73209189          | Exon5      | rs317682933         | C     | T        |                |
| 108 | 73210442          |            | rs740051404         | T     | C        |                |
| 109 | 73210665          |            | rs317824030         | A     | G        |                |
| 110 | 73211281          |            | rs16434839          | A     | G        |                |
| 111 | 73211321          |            | rs13774469          | T     | C        |                |
| 112 | 73211362          |            | rs13774471          | G     | T        |                |
| 113 | 73211482          | 3'         | rs313642761         | C     | A        |                |
| 114 | 73211972          | downstream | rs316810719         | T     | C        |                |
| 115 | 73212017          | region     | rs316133489         | A     | C        |                |
| 116 | 73212039          |            | rs316773975         | G     | A        |                |
| 117 | 73212039          |            | rs794449055         | G     | A        |                |
| 118 | 73212050          |            | rs741772450         | C     | A        |                |
| 119 | 73212572          |            | rs316576898         | T     | A        |                |
| 120 | 73212588          |            | rs317722924         | A     | G        |                |

|     |                       |             |               |     |       |
|-----|-----------------------|-------------|---------------|-----|-------|
| 121 | 73212595              | rs317608264 | C             | T   |       |
| 122 | 73212671              | rs318192845 | G             | A   |       |
| 123 | 73212782              | rs312286641 | T             | C   |       |
| 124 | 73212799              | rs312783383 | C             | A   |       |
| 125 | 73212803              | rs313438885 | C             | A   |       |
| 126 | 73212862              | novel       | G             | C   |       |
| 127 | 73213423              | rs315186808 | T             | G   |       |
| 128 | 73213450              | rs14489908  | G             | A   |       |
| 129 | 73213479              | rs14489909  | C             | T   |       |
| 130 | 73213609              | rs316100778 | T             | C   |       |
| 131 | 73213614              | rs317332365 | G             | A   |       |
| 132 | 73213728              | rs738691378 | C             | T   |       |
| 133 | 73213730              | rs16434842  | T             | C   |       |
| 134 | 73213732              | novel       | A             | C   |       |
| 135 | 73213740              | rs16434843  | A             | T   |       |
| 136 | 73213756              | novel       | C             | T   |       |
| 137 | 73213758              | novel       | A             | T   |       |
| 138 | 73213822              | novel       | A             | C   |       |
| 139 | 73214036              | rs736432740 | T             | C   |       |
| 140 | 73214037              | rs741144618 | G             | A   |       |
| 141 | 73214104              | rs314260446 | C             | T   |       |
| 142 | 73214106              | rs316589852 | C             | T   |       |
| 143 | 73214540              | rs731882782 | T             | C   |       |
| 144 | 73214886              | rs313925792 | G             | A   |       |
| 145 | 73214983              | rs13774475  | T             | C   |       |
| 146 | 73215008              | rs13774476  | A             | G   |       |
| 147 | 73215026              | rs13774477  | G             | A   |       |
| 148 | 73215300              | rs737890322 | G             | A   |       |
| 149 | 73215333              | rs731102496 | T             | C   |       |
| 150 | 73215349              | rs734486715 | T             | C   |       |
| 151 | 73215352              | rs731723853 | C             | T   |       |
| 152 | 73215400              | rs737837005 | T             | C   |       |
| 153 | 73215404              | rs739853481 | A             | T   |       |
| 154 | 73215409              | novel       | TAA           | CCT |       |
| 155 | 73215430              | rs730883312 | C             | G   |       |
| 156 | 73215448              | rs739641522 | G             | A   |       |
| 157 | 73215528              | rs738315002 | G             | A   |       |
| 158 | 73215540-7<br>3215541 | novel       | TCGTCG<br>GCT | del | CSNP4 |
| 159 | 73215738              | rs313971226 | C             | T   |       |
| 160 | 73215877              | rs314426816 | G             | A   | CSNP5 |
| 161 | 73215889              | rs14489910  | T             | C   |       |
| 162 | 73215916              | rs14489911  | T             | C   |       |
| 163 | 73215980              | rs80599842  | A             | G   |       |

|     |                   |             |     |                              |
|-----|-------------------|-------------|-----|------------------------------|
| 164 | 73216019          | novel       | del | GTTTT                        |
| 165 | 73216035          | rs14489913  | A   | G                            |
| 166 | 73216077          | rs14489914  | A   | G                            |
| 167 | 73216106          | rs14489915  | A   | G                            |
| 168 | 73216117          | rs14489916  | G   | A                            |
| 169 | 73216147          | rs313442202 | G   | A                            |
| 170 | 73216150          | rs80613272  | C   | T                            |
| 171 | 73216246          | rs80649019  | G   | C                            |
| 172 | 73216279          | rs736014693 | AA  | G                            |
| 173 | 73216321          | rs736601394 | C   | T                            |
| 174 | 73216431-73216566 | novel       | del | 136 bp sequence <sup>3</sup> |
| 175 | 73216652          | rs734398941 | G   | A                            |
| 176 | 73216683          | novel       | AC  | GT                           |
| 177 | 73216697          | novel       | CT  | GA                           |
| 178 | 73216702          | rs731612315 | T   | A                            |
| 179 | 73216713          | rs738375545 | T   | C                            |
| 180 | 73216720          | rs741746296 | T   | C                            |
| 181 | 73216733          | rs731451820 | C   | G                            |
| 182 | 73216947          | rs313418816 | G   | A                            |

<sup>1</sup> Physical positions of variants are given based on the UCSC galGal6.0 genome assembly.

<sup>2</sup> The allele is present in the High-growth or Low-growth haplotypes, respectively.

<sup>3</sup> 136 b sequence =

ATCATAGAATCGCTAAGGTTGGAAAAGACCCACAGGATCATCCAGTCCAACCATCCGCCCTTCATCAATGGTTCTCGCT  
AAACCATGTCCCTCAACACAACATCCAAACGCTCTTTAAACACTACCAGGCTCGGTG

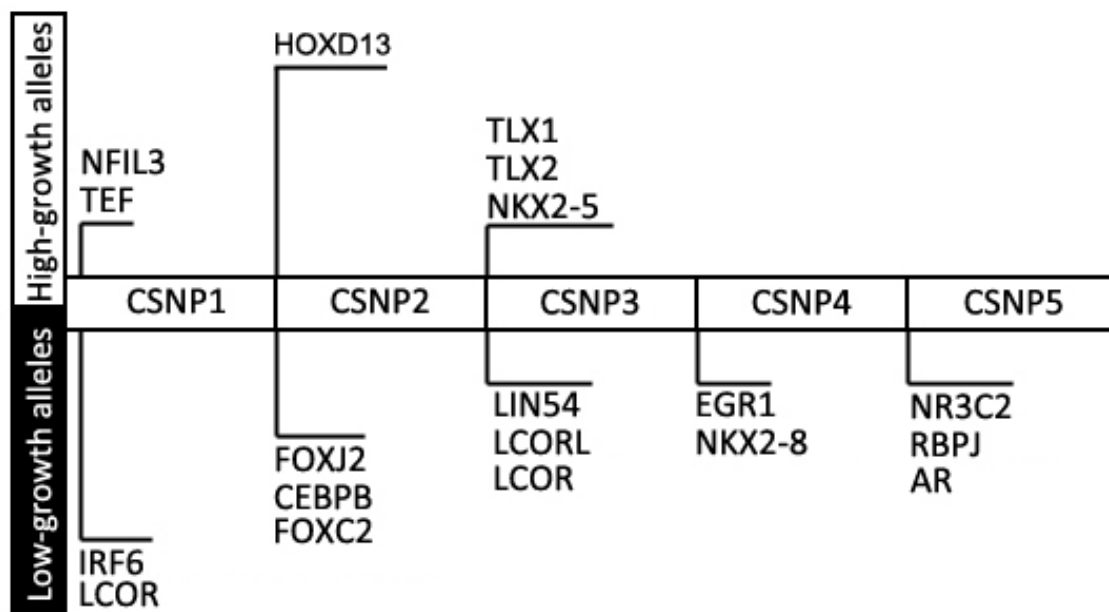

**Figure S1** Effects of five conserved element variants on TF binding motifs

High- and low-growth alleles represent alleles contained in the high- and low-growth haplotypes, respectively. TFs at two sides of the bar represent that their motifs are created by high- or low-growth alleles.

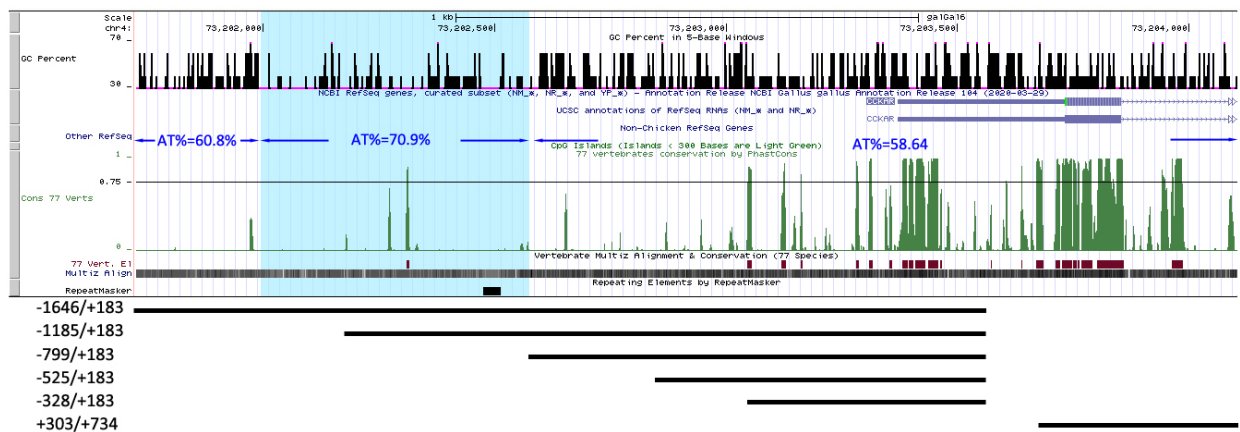

**Figure S2** Distribution of GC content in upstream region of chicken *CCKAR* gene

The screen shot of UCSC Genome Browsers showed GC content and conservation tracts in -1646 bp~+734 bp from the TSS of *CCKAR*. An AT-rich region exists in this region and is highlighted in light blue. Beneath this plot, black lines represent fragments analyzed in the reporter assay. At the left of black lines the numbers indicate the nucleotide positions of the 5'-end/3'-end of fragments relative to the TSS.



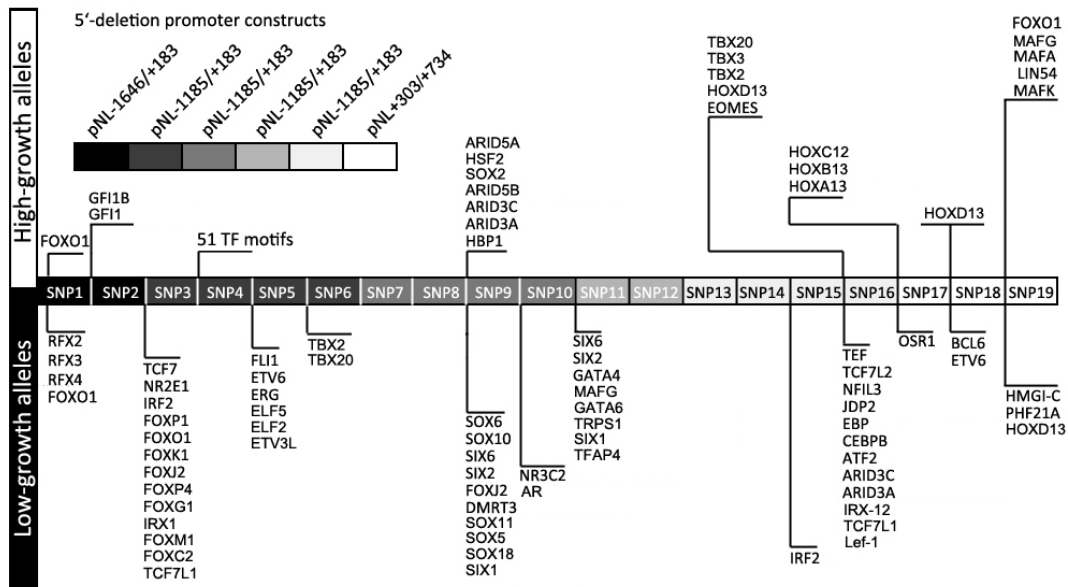

**Figure S3** Effects of promoter variants of *CCKAR* on TF binding motifs

High- and low-growth alleles represent ones contained in the high- and low-growth haplotypes, respectively. TF displayed below the grayscale bar indicate that their motifs are created by the low-growth alleles whilst upper ones exist in the case for high-growth alleles.

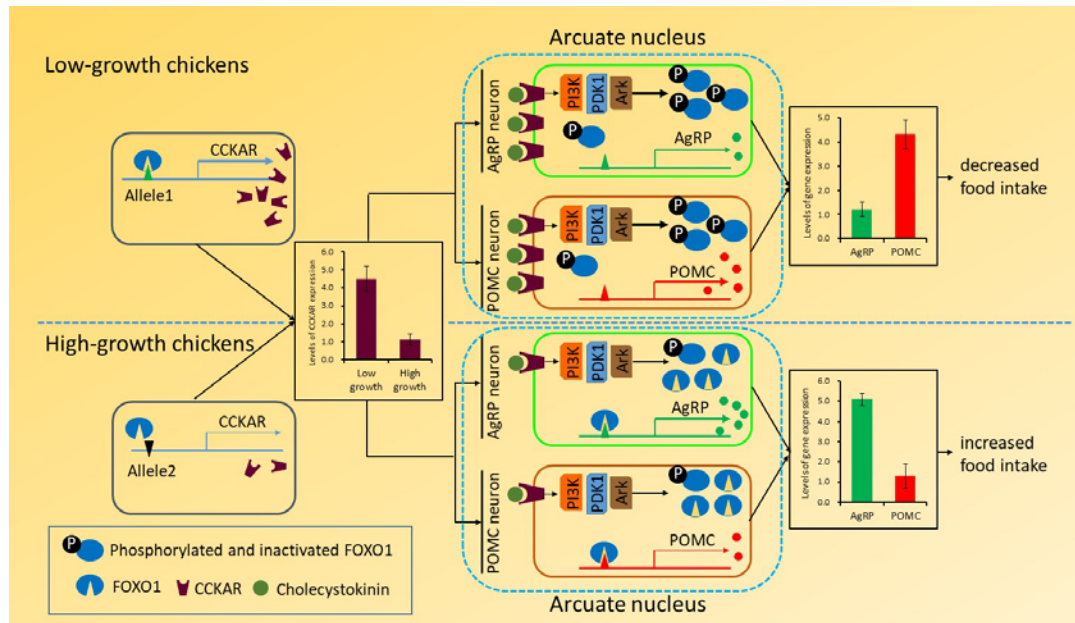

**Figure S4 An interrelationship model of CCKAR and FOXO1 in appetite regulation**

This interrelationship model is proposed based on regulatory roles of FOXO1 in *AgRP* and *POMC* expression and association of CCK signaling with expressions of *AgRP* and *POMC* [16,35,36]. In the interrelationship model, FOXO1 is a putative TF activating CCKAR expression. In appetite-regulating neurons, FOXO1 activates *AgRP* expression and suppresses *POMC* transcription, but phosphorylation of FOXO1 suppresses FOXO1-DNA interaction, which reverses expression profiles of *AgRP* and *POMC* [29]. The CCK signal is hypothesized to activate the phosphorylation of FOXO1 via the PI3K/PDK1/PKB–FoxO1 signaling axis. In high-growth chickens, decreased expression of CCKAR will inhibit the phosphorylation of FOXO1, which produces an orexigenic effect. In low-growth chickens, higher expression of CCKAR facilitates the phosphorylation of FOXO1, which inhibits appetite.
